# Supplementary material for: IL-15 synergizes with CD40 agonist antibodies to induce durable immunity against bladder cancer
Source: PubMed Central journal article supplement — Proc Natl Acad Sci U S A. 2023 Aug 22;120(35):e2306782120. doi: 10.1073/pnas.2306782120 (PMC10467355; doi:10.1073/pnas.2306782120), 2023-08-22
Supplement: pnas.2306782120.sapp.pdf [file pnas.2306782120.sapp.pdf]

## Supporting Information for:

### IL-15 synergizes with CD40 agonist antibodies to induce durable immunity against bladder cancer

Jeffrey L. Wong<sup>1,2,7</sup>, Patrick Smith<sup>1</sup>, Juan Angulo-Lozano<sup>1</sup>, Daniel Ranti<sup>3,4</sup>, Bernard H. Bochner<sup>5</sup>, John P. Sfakianos<sup>6</sup>, Amir Horowitz<sup>3,4</sup>, Jeffrey V. Ravetch<sup>1\*</sup>, David A. Knorr<sup>1,2\*</sup>

#### Affiliations

<sup>1</sup>Laboratory of Molecular Genetics and Immunology, Rockefeller University, New York, NY

<sup>2</sup>Department of Medicine, Memorial Sloan Kettering Cancer Center, New York, NY

<sup>3</sup>The Marc and Jennifer Lipschultz Precision Immunology Institute, Icahn School of Medicine at Mount Sinai, New York, NY

<sup>4</sup>Department of Oncological Sciences, Tisch Cancer Institute, Icahn School of Medicine at Mount Sinai, New York, NY

<sup>5</sup>Department of Surgery, Memorial Sloan Kettering Cancer Center, New York, NY

<sup>6</sup>Department of Urology, Icahn School of Medicine at Mount Sinai, New York, NY

<sup>7</sup>Current address: Genentech, Inc., South San Francisco, CA, USA

\*Correspondence:

David Knorr [dknorr@rockefeller.edu](mailto:dknorr@rockefeller.edu)

Jeffrey Ravetch [ravetch@rockefeller.edu](mailto:ravetch@rockefeller.edu)

#### This PDF file includes:

Figures S1 to S3

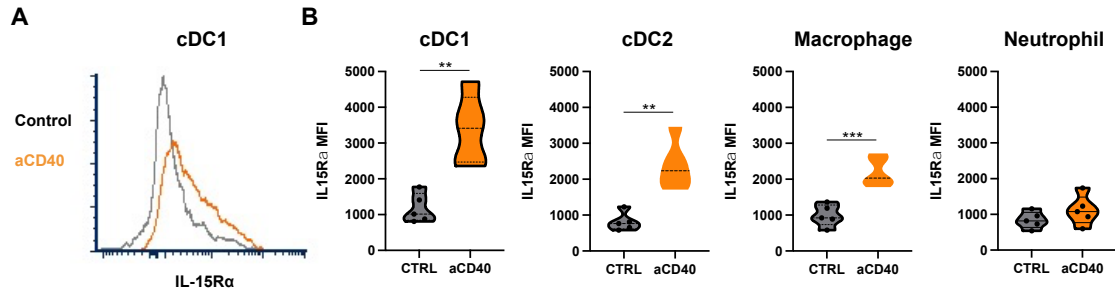

**Fig. S1.** CD40 agonism induces IL-15R $\alpha$  upregulation on dendritic cells in the UPPL1541 bladder tumor microenvironment. Mice bearing orthotopic UPPL1541 bladder tumors were treated intravesically with anti-CD40 antibody or isotype-matched control antibody on days 6 and 9 post-tumor implantation. (A) Representative histogram and (B) quantification across mice of IL-15R $\alpha$  mean fluorescence intensity on type-1 conventional DCs (cDC1; defined as F4/80<sup>-</sup>Ly-6G<sup>-</sup>CD11c<sup>+</sup>MHCII<sup>+</sup>XCR1<sup>+</sup>), type-2 conventional DCs (cDC2; defined as F4/80<sup>-</sup>Ly-6G<sup>-</sup>CD11c<sup>+</sup>MHCII<sup>+</sup>SIRP $\alpha$ <sup>+</sup>), macrophages (defined as CD11b<sup>+</sup>F4/80<sup>+</sup>Ly-6G<sup>-</sup>), and neutrophils (defined as CD11b<sup>+</sup>Ly-6G<sup>+</sup>) in the bladder microenvironment as assessed by flow cytometry at day 12 post-tumor implantation (n = 5 mice per group). \*\*p < 0.01, \*\*\*p < 0.001.

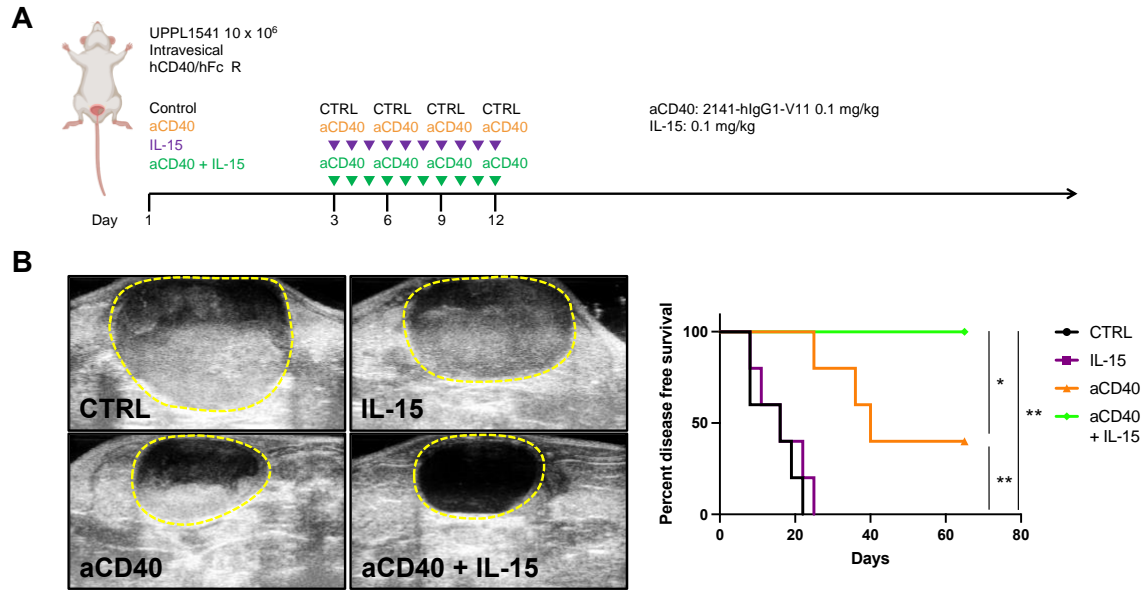

**Fig. S2.** Combination of Fc-optimized anti-CD40 agonist antibody 2141-V11 and IL-15 enhances anti-tumor activity against UPPL1541 tumors. (A) Schematic of the treatment of humanized hCD40/hFcR mice bearing orthotopic UPPL1541 bladder tumors with anti-CD40 antibody 2141-V11 and/or IL-15 or control (isotype-matched control antibody and/or vehicle). (B) Representative bladder ultrasound imaging (left) at day 45 post-tumor implantation and disease-free survival (right) of mice treated as outlined in A. \* $p < 0.05$ , \*\* $p < 0.01$ .

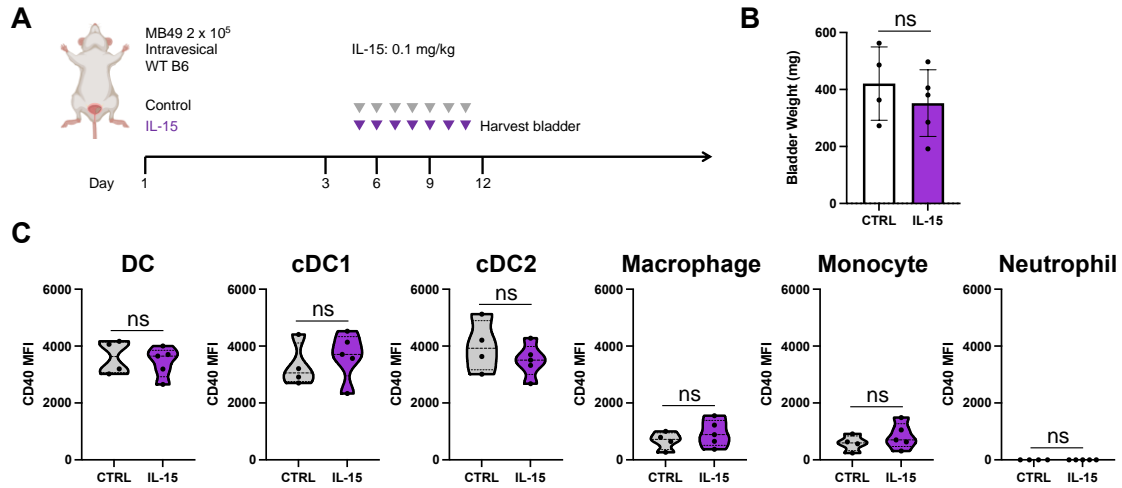

**Fig. S3.** IL-15 therapy does not modulate myeloid CD40 expression. (A) Schematic of the treatment of mice bearing orthotopic MB49 bladder tumors with IL-15 or vehicle control. (B) Bladder weights across mice at day 12 post-tumor implantation ( $n = 4-5$  mice per group; bars represent SD). (C) CD40 mean fluorescence intensity across mice on total dendritic cells (DC; defined as  $F4/80^-Ly-6G^-CD11c^+MHCII^+$ ), type-1 conventional DCs (cDC1; defined as  $F4/80^-Ly-6G^-CD11c^+MHCII^+XCR1^+$ ), type-2 conventional DCs (cDC2; defined as  $F4/80^-Ly-6G^-CD11c^+MHCII^+SIRP\alpha^+$ ), macrophages (defined as  $CD11b^+F4/80^+Ly-6G^-$ ), monocytes (defined as  $CD11b^{hi}Ly-6G^-$ ), and neutrophils (defined as  $CD11b^+Ly-6G^+$ ) in the bladder microenvironment as assessed by flow cytometry at day 12 post-tumor implantation ( $n = 4-5$  mice per group). ns = not significant.
